# Supplementary material
Source: PubMed Central journal article supplement (PMC5342927)

**Table S1.** Cluster peaks and local maxima of regions sensitive to the BIO > SCRAM contrast in whole-brain analysis, for the full sample (typically developing (TD) adults and children and adults and children with autism spectrum disorder (ASD); sample A) and the matched subsample of TD children and children with ASD (sample C).

| Site                                        | x   | y    | z   | Z    | k     |
|---------------------------------------------|-----|------|-----|------|-------|
| <b>TD adults &amp; children (sample A)</b>  |     |      |     |      |       |
| Right Middle Temporal Gyrus                 | 48  | -52  | 4   | 7.28 | 11554 |
| Right Temporal Occipital Fusiform Cortex    | 42  | -54  | -12 | 6.88 |       |
| Right Lateral Occipital Cortex              | 46  | -76  | -6  | 6.75 |       |
| Right Supramarginal Gyrus                   | 52  | -40  | 12  | 6.67 |       |
| Left Lateral Occipital Cortex               | -48 | -64  | 2   | 7.75 | 9130  |
| Left Temporal Occipital Fusiform Cortex     | -40 | -50  | -16 | 6.75 |       |
| Left Inferior Temporal Gyrus                | -46 | -54  | -8  | 6.66 |       |
| Right Precentral Gyrus                      | 48  | 2    | 40  | 5.30 | 1950  |
| Right Inferior Frontal Gyrus                | 48  | 16   | 22  | 5.09 |       |
| Left Frontal Orbital Cortex                 | -40 | 34   | -2  | 4.18 | 493   |
| Left Inferior Frontal Gyrus                 | -50 | 36   | 0   | 3.37 |       |
| Left Frontal Operculum Cortex               | -40 | 26   | 6   | 3.27 |       |
| Left Frontal Pole                           | -54 | 36   | 0   | 3.20 |       |
| Frontal Medial Cortex                       | -6  | 36   | -20 | 4.00 | 481   |
| Subcallosal Cortex                          | -2  | 24   | -20 | 3.60 |       |
| Frontal Medial Cortex                       | 0   | 44   | -16 | 3.23 |       |
| Frontal Pole                                | -6  | 56   | -14 | 3.19 |       |
| <b>TD children (sample C)</b>               |     |      |     |      |       |
| Right Occipital Pole                        | 36  | -92  | -6  | 7.26 | 6280  |
| Right Lateral Occipital Cortex              | 50  | -78  | -6  | 7.12 |       |
| Right Lateral Occipital Cortex              | 46  | -80  | -8  | 6.67 |       |
| Right Occipital Pole                        | 28  | -96  | -4  | 6.08 |       |
| Right Lateral Occipital Cortex              | 36  | -88  | -2  | 5.96 |       |
| Right Inferior Temporal Gyrus               | 52  | -52  | -14 | 5.95 |       |
| Left Lateral Occipital Cortex               | -38 | -66  | -4  | 7.60 | 3193  |
| Left Lateral Occipital Cortex               | -40 | -80  | -6  | 6.91 |       |
| Left Lateral Occipital Cortex               | -50 | -64  | 8   | 6.76 |       |
| Left Lateral Occipital Cortex               | -42 | -64  | -4  | 6.75 |       |
| Left Lateral Occipital Cortex               | -44 | -80  | -6  | 6.37 |       |
| Left Inferior Temporal Gyrus                | -44 | -54  | -8  | 5.98 |       |
| Inferior Frontal Gyrus                      | 48  | 16   | 22  | 5.70 | 890   |
| Inferior Frontal Gyrus                      | 52  | 14   | 24  | 5.40 |       |
| Middle Frontal Gyrus                        | 44  | 12   | 36  | 5.37 |       |
| Precentral Gyrus                            | 44  | 8    | 34  | 5.27 |       |
| Inferior Frontal Gyrus                      | 54  | 20   | 22  | 4.97 |       |
| Inferior Frontal Gyrus                      | 52  | 24   | 20  | 4.64 |       |
| Left Temporal Fusiform Cortex               | -36 | -4   | -34 | 5.45 | 542   |
| Left Temporal Pole                          | -32 | 18   | -30 | 3.97 |       |
| Left Amygdala                               | -28 | -4   | -24 | 3.80 |       |
| Left Optic Radiation                        | -34 | -10  | -20 | 3.77 |       |
| Left Amygdala                               | -20 | -4   | -16 | 3.52 |       |
| Left Amygdala                               | -16 | -8   | -14 | 3.48 |       |
| <b>ASD adults &amp; children (sample A)</b> |     |      |     |      |       |
| Right Temporal Occipital Fusiform Cortex    | 42  | -40  | -18 | 4.41 | 2764  |
| Right Middle Temporal Gyrus                 | 60  | -54  | 4   | 4.33 |       |
| Right Supramarginal Gyrus                   | 54  | -38  | 20  | 3.93 |       |
| Left VI                                     | -36 | -46  | -26 | 4.46 | 1967  |
| Left Occipital Pole                         | -22 | -104 | -4  | 4.23 |       |
| Left Temporal Occipital Fusiform Cortex     | -38 | -52  | -20 | 4.08 |       |
| Left Middle Temporal Gyrus                  | -52 | -54  | 8   | 4.06 |       |
| Right Amygdala                              | 12  | -6   | -16 | 4.07 | 418   |

**Table SI (cont'd).**

| Site                                                 | x   | y   | z   | Z    | k    |
|------------------------------------------------------|-----|-----|-----|------|------|
| <b>ASD adults &amp; children (sample A) (cont'd)</b> |     |     |     |      |      |
| Right Temporal Pole                                  | 26  | 6   | -26 | 3.13 |      |
| <b>ASD children (sample C)</b>                       |     |     |     |      |      |
| Right Supramarginal Gyrus                            | 56  | -42 | 20  | 4.62 | 1127 |
| Right Angular Gyrus                                  | 64  | -50 | 20  | 4.16 |      |
| Right Middle Temporal Gyrus                          | 54  | -54 | 10  | 4.15 |      |
| Right Supramarginal Gyrus/Inferior parietal lobule   | 66  | -34 | 34  | 4.15 |      |
| Right Middle Temporal Gyrus                          | 52  | -50 | 2   | 4.01 |      |
| Right Thalamus                                       | 12  | -16 | 10  | 3.83 | 805  |
| Right Caudate                                        | 14  | -8  | 20  | 3.75 |      |
| Right Caudate                                        | 10  | 6   | 10  | 3.71 |      |
| Right Corticospinal tract                            | 24  | -12 | 8   | 3.34 |      |
| Right Temporal Occipital Fusiform Cortex             | 42  | -40 | -20 | 4.64 | 653  |
| Right Temporal Fusiform Cortex                       | 38  | -36 | -20 | 4.40 |      |
| Right Temporal Fusiform Cortex                       | 42  | -28 | -24 | 3.94 |      |
| Left VI                                              | -36 | -56 | -28 | 4.10 | 537  |
| Left Temporal Occipital Fusiform Cortex              | -36 | -46 | -24 | 3.70 |      |
| Left VI                                              | -38 | -52 | -28 | 3.54 |      |
| Left Temporal Occipital Fusiform Cortex              | -38 | -50 | -18 | 3.48 |      |
| Left Crus I                                          | -46 | -64 | -24 | 3.32 |      |
| Left VI                                              | -36 | -44 | -30 | 3.51 |      |

*Note.* Coordinates are reported in MNI space. *Z*: Z-statistic. *k*: Cluster voxel extent.

**Table SII.** Cluster peaks and local maxima of cerebellar regions responsive to the BIO > SCRAM  $\times$  LpSTS interaction in PPI analysis, controlling for age, within the full sample (sample A).

| Site                                            | Prob. | x   | y   | z   | Z    | k   |
|-------------------------------------------------|-------|-----|-----|-----|------|-----|
| <b>BIO &gt; SCRAM <math>\times</math> LpSTS</b> |       |     |     |     |      |     |
| <b>TD</b>                                       |       |     |     |     |      |     |
| Left Crus II                                    | 91%   | -16 | -84 | -39 | 3.64 | 114 |
| Left Crus I                                     | 93%   | -26 | -86 | -35 | 2.63 |     |
| Left VIIa                                       | 79%   | -30 | -46 | -55 | 3.59 | 64  |
| Left VIIb                                       | 73%   | -26 | -38 | -51 | 3.24 |     |
| Right VIIa                                      | 41%   | 30  | -44 | -55 | 5.88 | 19  |
| Right I-IV                                      | 28%   | 28  | -34 | -25 | 3.24 | 19  |
| Right V                                         | 24%   | 32  | -38 | -25 | 2.67 |     |
| Right X                                         | 93%   | 24  | -36 | -43 | 2.92 | 18  |
| <b>ASD</b>                                      |       |     |     |     |      |     |
| Left Crus II                                    | 100%  | -28 | -80 | -47 | 3.97 | 250 |
| Left Crus I                                     | 78%   | -34 | -80 | -39 | 3.49 |     |
| Left VIIb                                       | 36%   | -2  | -76 | -43 | 3.34 |     |
| Left Crus II                                    | 100%  | -14 | -90 | -35 | 3.08 |     |
| Right Crus II                                   | 67%   | 6   | -76 | -37 | 3.05 |     |

**Figure S1.** Regions displaying significant response to the BIO > SCRAM contrast in the whole-brain analysis for each of the TD (typically developing) and ASD (autism spectrum disorder) groups (both full samples and matched child samples), presented as an axial mosaic in MNI space, with every second slice displayed. Colormap ranges are group-specific; for each group, the value mapped to the top of the color range is close to the group-specific maximum z-value in order to better reveal within-group peak

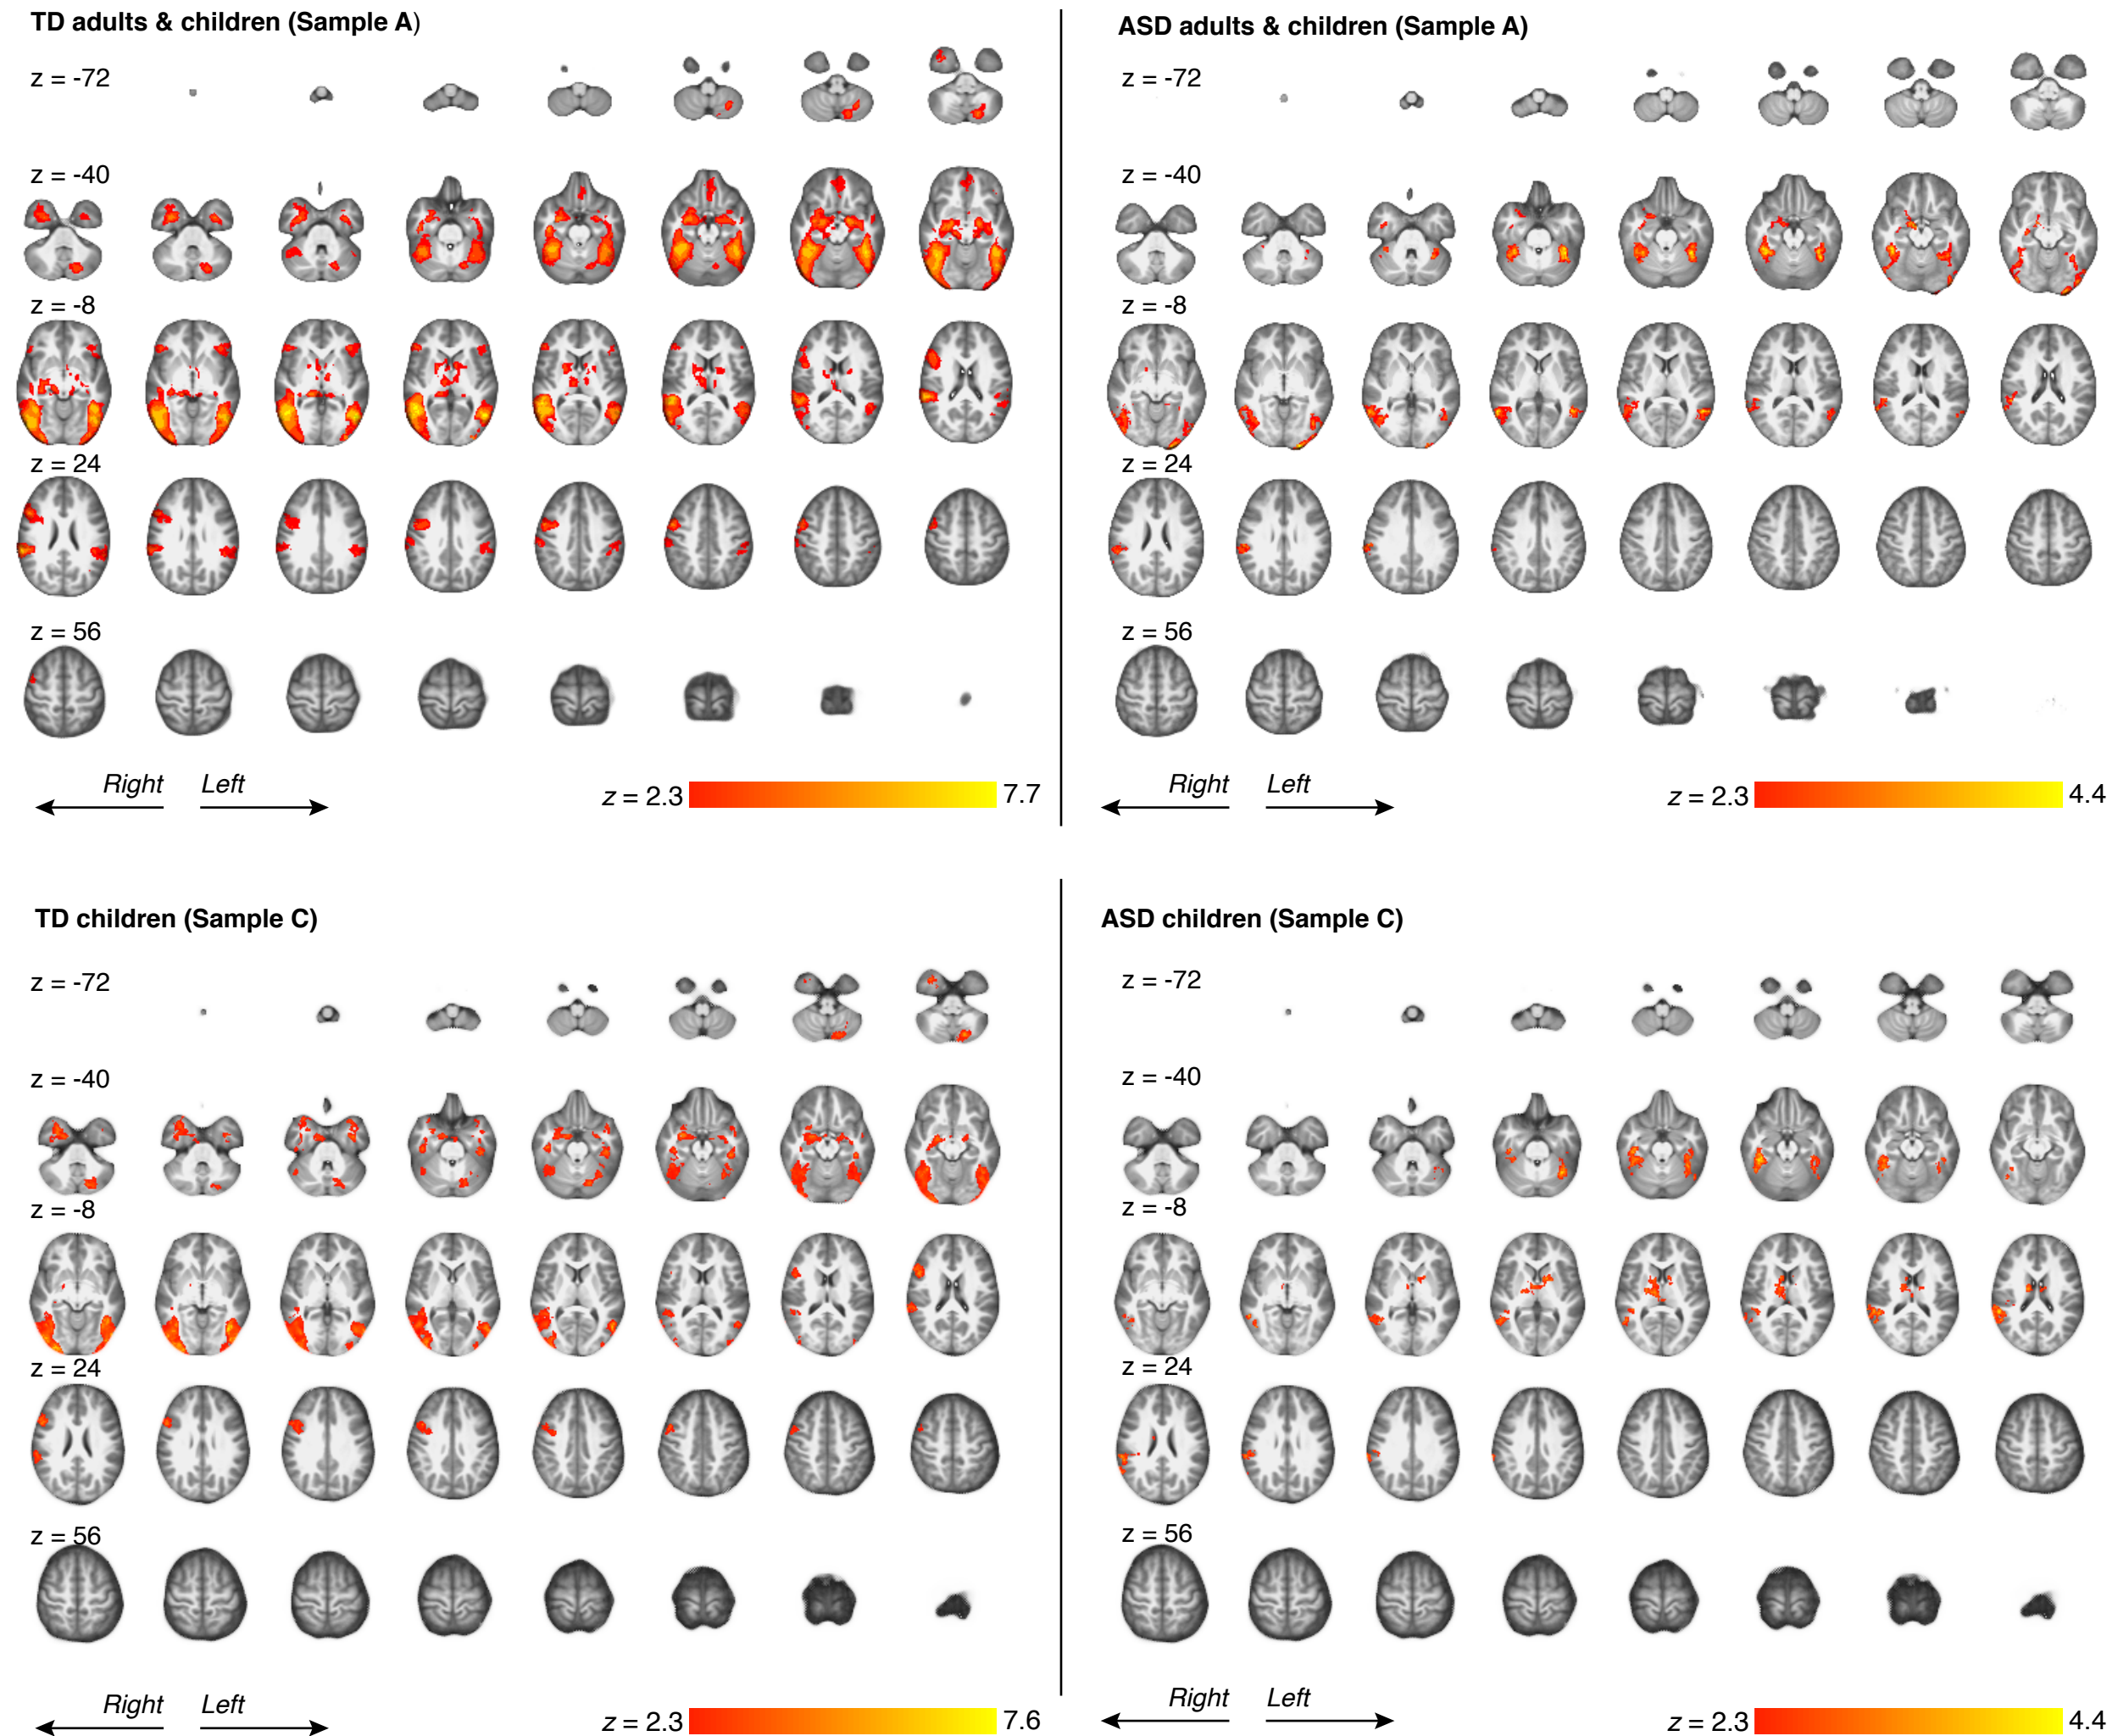

**Figure S2.** Details of PPI seed creation. **A)** Every sagittal and axial slice of the right posterior superior temporal sulcus (RpSTS) seed is displayed on the MNI standard space template, with coordinates in mm. The left pSTS seed (not shown) is the mirror image of this mask. **B)** Example of seed creation workflow illustrated on a representative axial slice ( $z = 6$ ). Thresholded z-statistic images representing brain regions significantly responsive to the BIO > SCRAM (whole-brain) contrast, within the full TD and ASD samples, as well as the matched child samples, were binarized, and a mask was created in the region of overlap within the posterior continuing branch of the STS. **C)** Manual adjustments to the merged, binarized overlap mask included minor hole-filling and removal of “stray” voxels to create a coherent seed region.

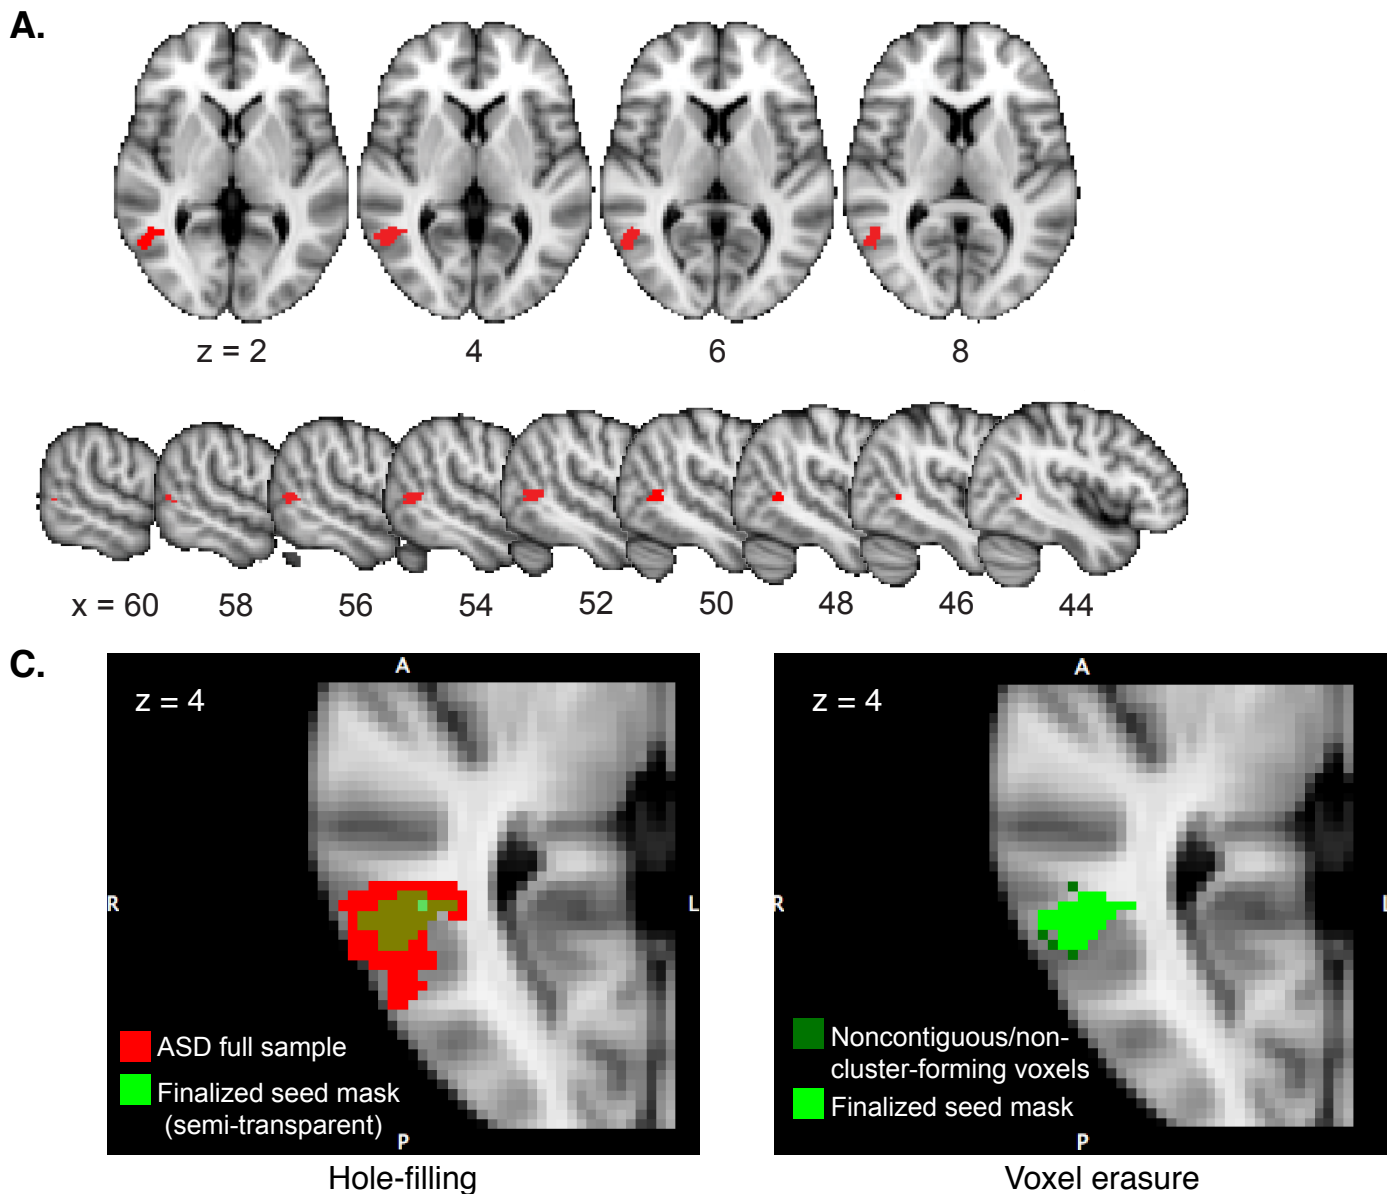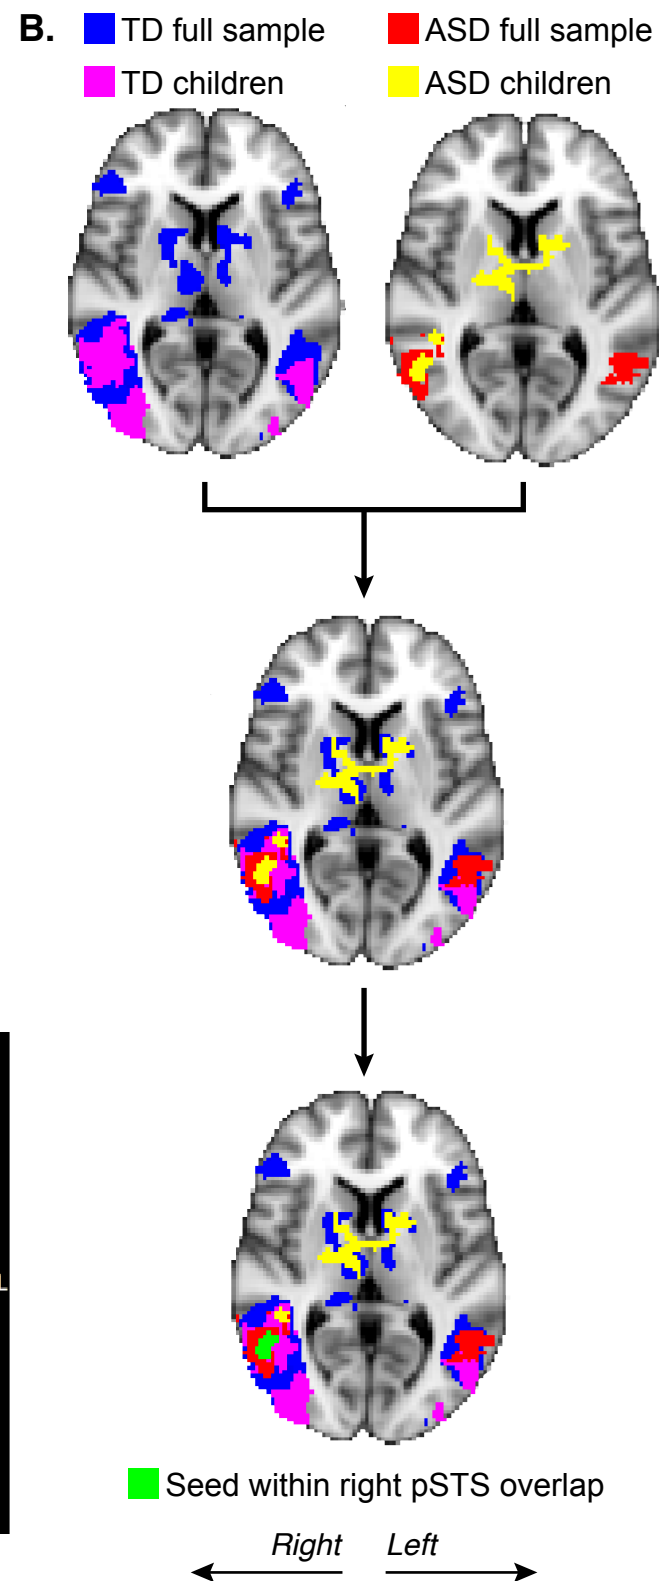

**Figure S3.** Flattened z-statistic displays of regions displaying a significant psychophysiological interaction (PPI) between the BIO > SCRAM contrast and a seed region in left posterior superior temporal sulcus (LpSTS) within A) the full sample of TD adults and children and B) the full sample of adults and children with ASD, with outlines indicating lobular structure overlaid in black. For comparison, results obtained using the right pSTS seed are inset.

**BIO > SCRAM × LpSTS (PPI)**

*Controlling for age.*

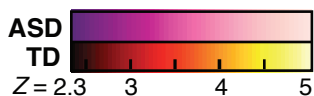

BIO > SCRAM × RpSTS

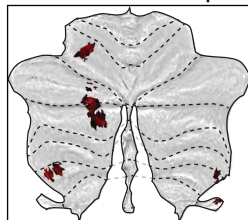

**A. TD adults & children (n = 62)**

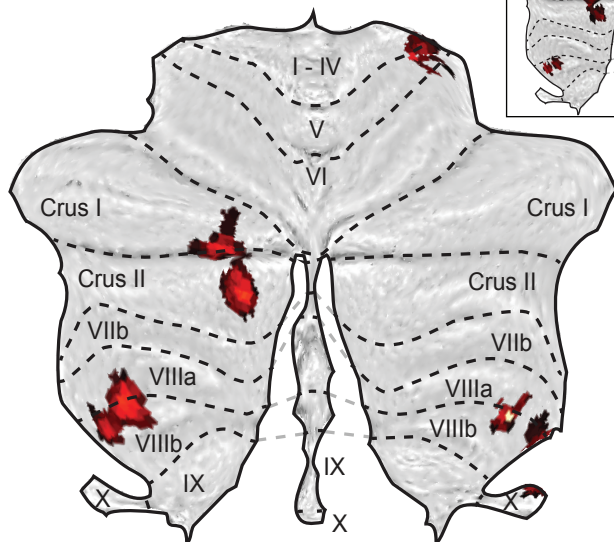

BIO > SCRAM × RpSTS

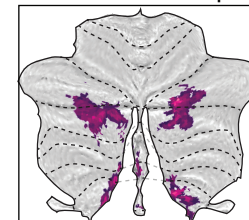

**B. ASD adults & children (n = 35)**

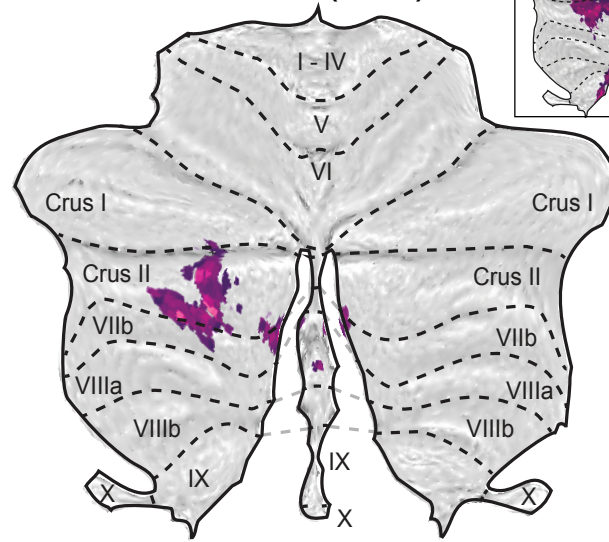

Supplement: NIHMS834778-supplement-Sup_Info.pdf [file NIHMS834778-supplement-Sup_Info.pdf]
